# Supplementary material
Source: Elsevier journal article supplement (https://www.sciencedirect.com/science/article/pii/S0300893220307004)
Supplement: mmc1 [file S0300893220307004:mmc1.pdf]

## SUPPLEMENTARY DATA

Table 1 of the supplementary data

Univariate analysis considering clinical VA as the outcome of interest (secondary outcome)

| Risk factor                                            | OR    | 95%CI      | P    |
|--------------------------------------------------------|-------|------------|------|
| <b>Clinical</b>                                        |       |            |      |
| <i>QRS &gt;180 ms</i>                                  | 3.71  | 0.83-16.64 | .086 |
| <i>Hi-PVCs/NSVT</i>                                    | 10.18 | 1.83-56.54 | .008 |
| <i>Atrial flutter</i>                                  | 6.67  | 1.48-30.10 | .014 |
| <b>Cardiac magnetic resonance (n = 51)</b>             |       |            |      |
| <i>RV ejection fraction (CMR), %</i>                   | 0.93  | 0.84-1.02  | .130 |
| <b>Electrophysiological study</b>                      |       |            |      |
| <i>VT induction in the EPS</i>                         | 4.20  | 1.06-16.68 | .041 |
| <i>HV, ms</i>                                          | 1.04  | 0.99-1.10  | .136 |
| <i>HV &gt; 55 ms</i>                                   | 3.75  | 0.94-14.95 | .061 |
| <b>Electroanatomical map</b>                           |       |            |      |
| <i>RV scar area, cm<sup>2</sup> (n = 53)</i>           | 1.04  | 0.99-1.09  | .117 |
| <i>Scar percentage (n = 53)</i>                        |       |            |      |
| RV                                                     | 1.14  | 1.0-1.29   | .048 |
| RVOT                                                   | 1.11  | 0.97-1.26  | .131 |
| <i>Stratified RV activation time (10 ms intervals)</i> | 1.22  | 1.02-1.47  | .029 |
| <i>Infundibular activation time, ms</i>                | 1.01  | 0.99-1.03  | .177 |
| <i>Isthmi</i>                                          | 0.91  | 0.33-1.14  | .120 |
| <b>Electrograms</b>                                    |       |            |      |
| <i>Double potentials</i>                               | 6.07  | 0.71-51.71 | .099 |

RV, right ventricle; RVOT, right ventricle outflow tract; VA, ventricular arrhythmia.

**Table 2 of the supplementary data**

Sensitivity analysis excluding patients with prior ablation.

The final most parsimonious multivariate model included the following variables: RV activation time, HV interval > 55 ms, and the presence of high-frequency premature ventricular contractions (Hi-PVC) or nonsustained ventricular tachycardia (NSVT). The logistic model that was adjusted is presented in the table:

|                    | Coefficient | OR    | 95%CI       | P    |
|--------------------|-------------|-------|-------------|------|
| Intercept          | -6.76       |       |             | .003 |
| Hi-PVC/NSVT        | 2.43        | 11.34 | 1.50-85.97  | .019 |
| HV > 55 ms         | 3.05        | 21.20 | 3.11-144.14 | .002 |
| RV activation time | 0.03        | 1.03  | 1.00-1.06   | .035 |

Hi-PVC, high-frequency premature ventricular contractions; NSVT, non-sustained ventricular tachycardia; RV, right ventricle.

**Table 3 of the supplementary data**

The following table shows the logistic model excluding patients who underwent prior ablation.

No major variations were observed.

|                    | Coefficient | OR    | 95%CI       | P    |
|--------------------|-------------|-------|-------------|------|
| Intercept          | -5.23       |       |             | .005 |
| Hi-PVC/NSVT        | 2.55        | 12.85 | 1.27-130.3  | .031 |
| HV > 55 ms         | 3.35        | 28.39 | 2.98-270.68 | .004 |
| RV activation time | 0.01        | 1.01  | 0.98-1.05   | .422 |

Hi-PVC, high-frequency premature ventricular contractions; NSVT, non sustained ventricular tachycardia; RV, right ventricle.
